# Supplementary material
Source: Springer Nature journal article supplement (https://www.springermedizin.de/resource/supplementary/13601_2014_1061_MOESM2_ESM.pdf/9678612)
Supplement: MOESM2 [file 9678612]

- Polcalcins
- Ole e 1 related
- Pectate lyase
- Poligalacturonase

Pollen-Pollen

- Storage proteins
- nsLTP
- TLP

Plant food-  
Plant food

CCD

Pollen-  
Plant food

- Profilin
- Bet v1-homologues
- nsLTP
- TLP

Pollen-  
Plant food-latex

- Profilin
- Beta-1,3-glucanase
- Hevein-like domain proteins
